# Supplementary material for: Stacks: Building and Genotyping Loci De Novo From Short-Read Sequences
Source: PubMed Central journal article supplement (PMC3276136; doi:10.1534/g3.111.000240), 2011-08-01
Supplement: supp_1.3.171_FigureS2.pdf [file supp_1.3.171_FigureS2.pdf]

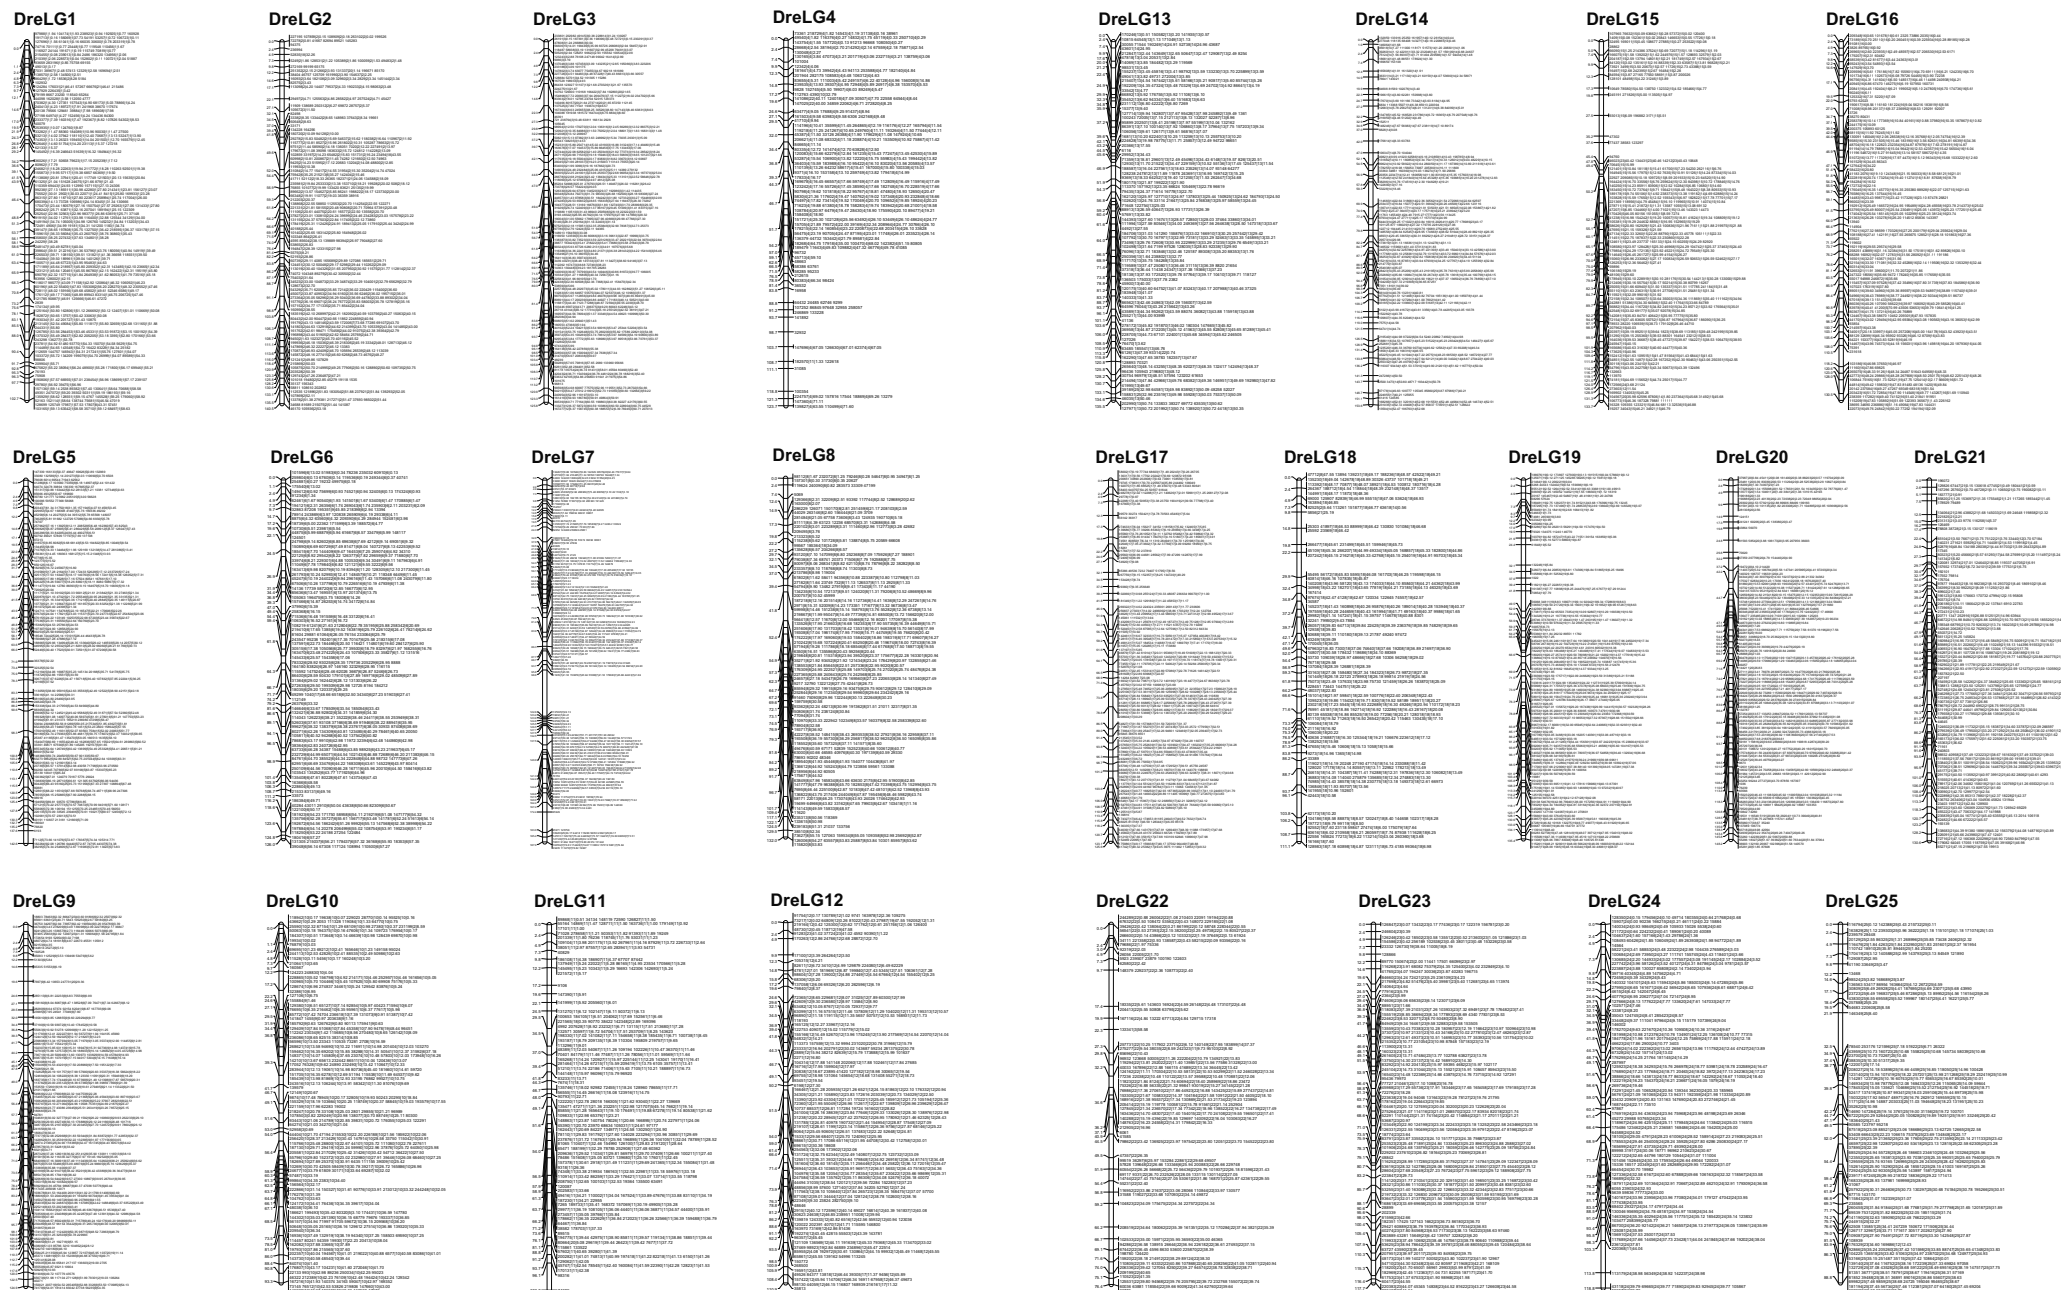

**Figure S2** *Danio rerio* RADmap. We mapped 7,861 markers generated from a doubled haploid mapping panel; analysis by *Stacks* recapitulated the 25 zebrafish linkage groups. A c. We reconstructed the HSmmap from its original set of markers and combined the HSmmap markers with the new, RAD-seq markers and built a second map. LG20 shows very close agreement between markers in both maps, as indicated by red lines that connect identical markers in the two maps.
