# Supplementary material for: Stacks: Building and Genotyping Loci De Novo From Short-Read Sequences
Source: PubMed Central journal article supplement (PMC3276136; doi:10.1534/g3.111.000240), 2011-08-01
Supplement: supp_1.3.171_FigureS3.pdf [file supp_1.3.171_FigureS3.pdf]

# DreLG20

## 157 EST markers

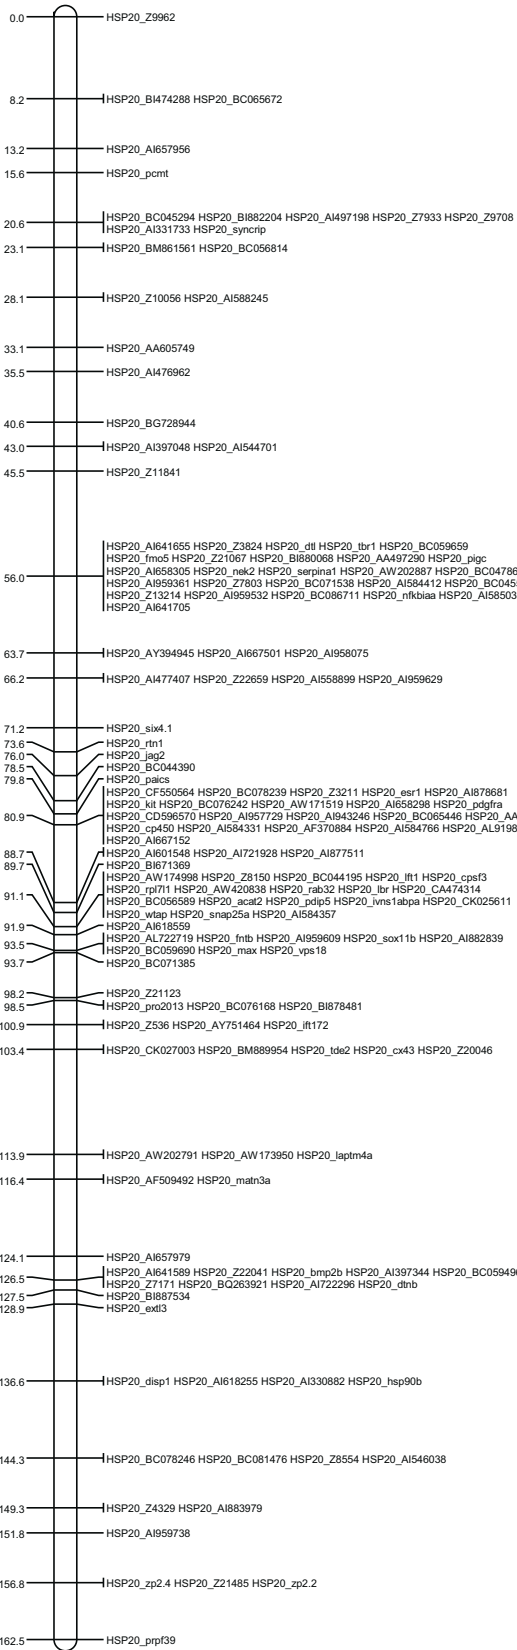

# DreLG20

## 311 RAD markers

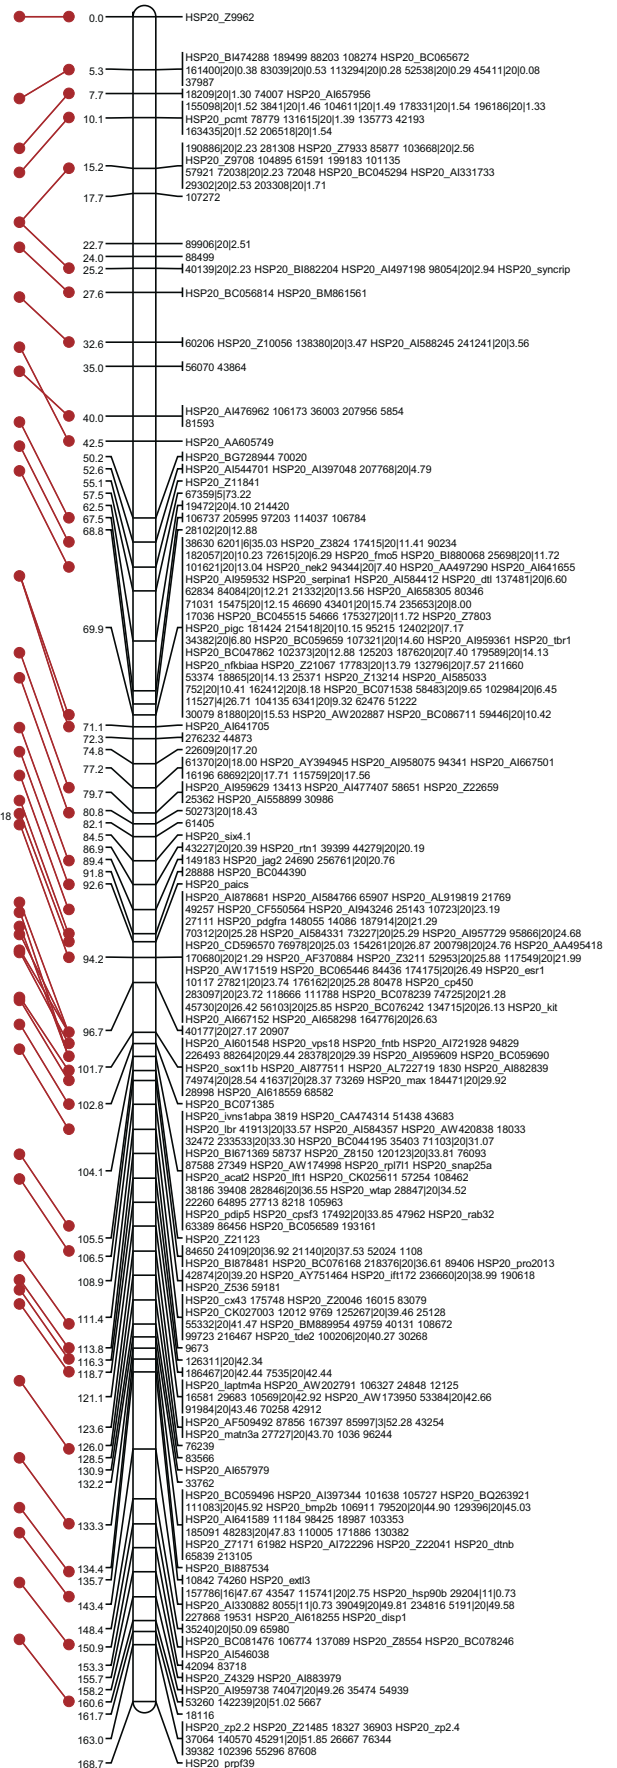

**Figure S3** HSmap versus RADmap. We reconstructed the HSmap from its original set of markers and combined the HSmap markers with the new, RAD-seq markers and built a second map. LG20, shown here, and all other linkage groups, shows very close agreement between markers in both maps, as indicated by red lines that connect identical markers in the two maps.
